# Supplementary material
Source: MDPI journal article supplement (https://www.mdpi.com/2674-0583/2/1/2)
Supplement: s1 [file s1]

Supplementary Information

# Chemo-Enzymatic Synthesis of Bioactive Carbazole Derivatives

Saad Alrashdi <sup>1,2,†</sup>, Federica Casolari <sup>1,†</sup>, Kwaku Kyeremeh <sup>3</sup> and Hai Deng <sup>1,\*</sup>

<sup>1</sup> Department of Chemistry, University of Aberdeen, Aberdeen AB24 3UE, UK; s.alrashdi.18@abdn.ac.uk (S.A.); federica.casolari@abdn.ac.uk (F.C.)

<sup>2</sup> College of Science and Arts in Gurayat, Jouf University, King Khaled Road, Sakakah, Saudi Arabia

<sup>3</sup> Marine and Plant Research Laboratory of Ghana, Department of Chemistry, University of Ghana, Legon-Accra P.O. Box LG56, Ghana; kkyeremeh@ug.edu.gh

\* Correspondence: h.deng@abdn.ac.uk

† These authors contributed equally to this work.

## Contents

|                                                                                                                                                                                     |    |
|-------------------------------------------------------------------------------------------------------------------------------------------------------------------------------------|----|
| <b>Figure S1.</b> Acyl-SNAC species utilised in this study.....                                                                                                                     | 3  |
| <b>Figure S2.</b> SDS-PAGE electrophoresis analysis confirming correct expression and purity of protein TrpB (45.0 kDa), NzsH (64.0 kDa), NzsI (28.0 kDa) and NzsJ (35.0 kDa). .... | 4  |
| <b>Figure S3.</b> HR-LCMS analysis confirming production of isovaleryl-carbazole.....                                                                                               | 5  |
| <b>Figure S4.</b> HR-LCMS analysis confirming production of acetyl-carbazole. ....                                                                                                  | 6  |
| <b>Figure S5.</b> HR-LCMS analysis confirming production of phenyl-carbazole. ....                                                                                                  | 7  |
| <b>Figure S6.</b> HR-LCMS analysis confirming production of phenyl-acetyl-carbazole. ....                                                                                           | 8  |
| <b>Figure S7.</b> HR-LCMS analysis confirming production of decanoyl-carbazole. ....                                                                                                | 9  |
| <b>Figure S8.</b> HR-LCMS analysis confirming production of isobutyryl-carbazole. ....                                                                                              | 10 |
| <b>Figure S9.</b> HR-LCMS analysis confirming production of valeryl-carbazole. ....                                                                                                 | 11 |
| <b>Figure S10.</b> HR-LCMS analysis confirming production of propanoyl-carbazole. ....                                                                                              | 12 |
| <b>Figure S11.</b> HR-LCMS analysis confirming production of butyl-carbazole.....                                                                                                   | 13 |
| <b>Figure S12.</b> HR-LCMS analysis confirming production of hexyl-carbazole. ....                                                                                                  | 14 |
| <b>Figure S13.</b> 5-step one-pot enzymatic reaction and HR-LCMS analysis confirming production of 4-fluoro-isovaleryl-carbazole. ....                                              | 15 |
| <b>Figure S14.</b> 5-step one-pot enzymatic reaction and HR-LCMS analysis confirming production of isovaleryl-carbazole. ....                                                       | 16 |

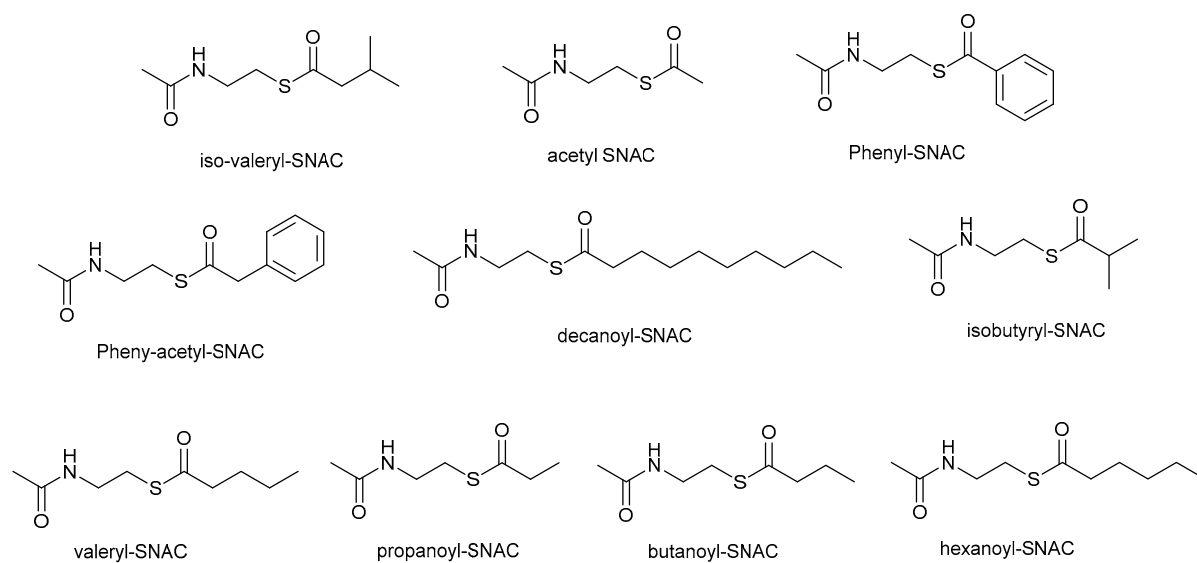

**Figure S1.** Acyl-SNAC species utilised in this study.

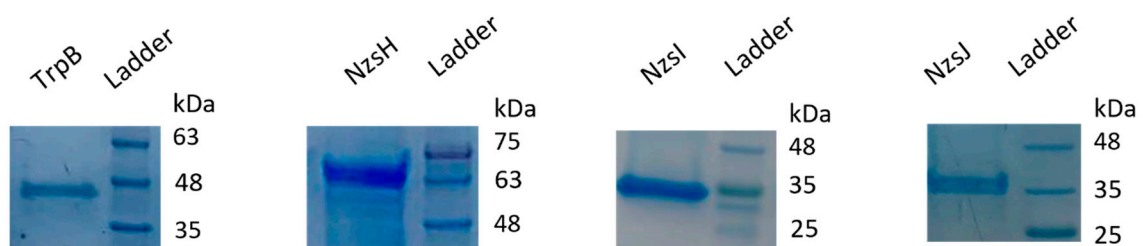

**Figure S2.** SDS-PAGE electrophoresis analysis confirming correct expression and purity of protein TrpB (45.0 kDa), NzsH (64.0 kDa), NzsI (28.0 kDa) and NzsJ (35.0 kDa).

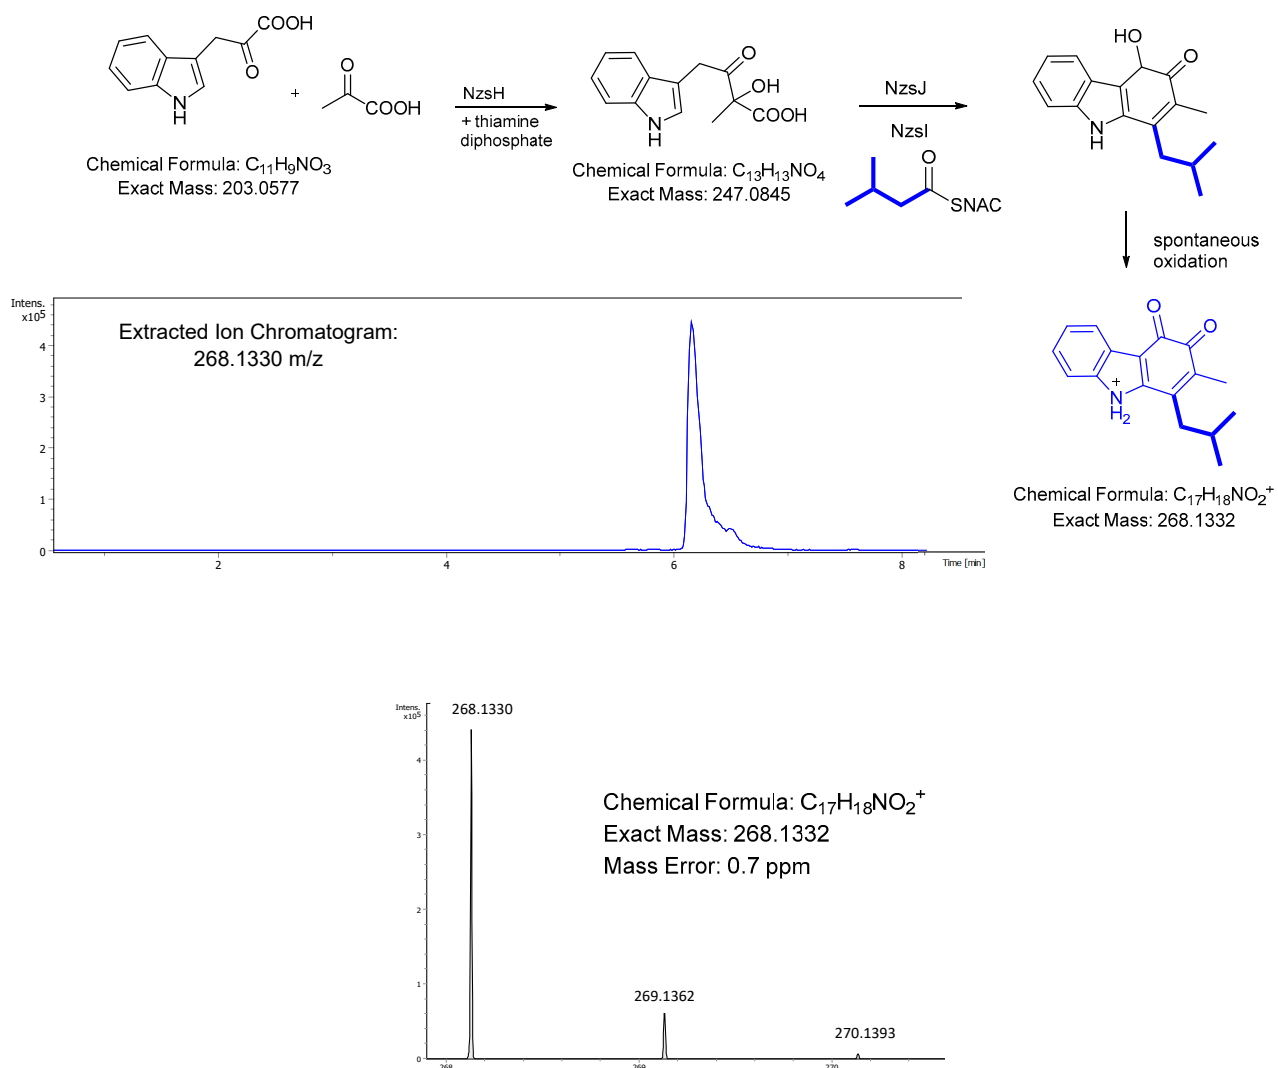

**Figure S3.** HR-LCMS analysis confirming production of isovaleryl-carbazole.

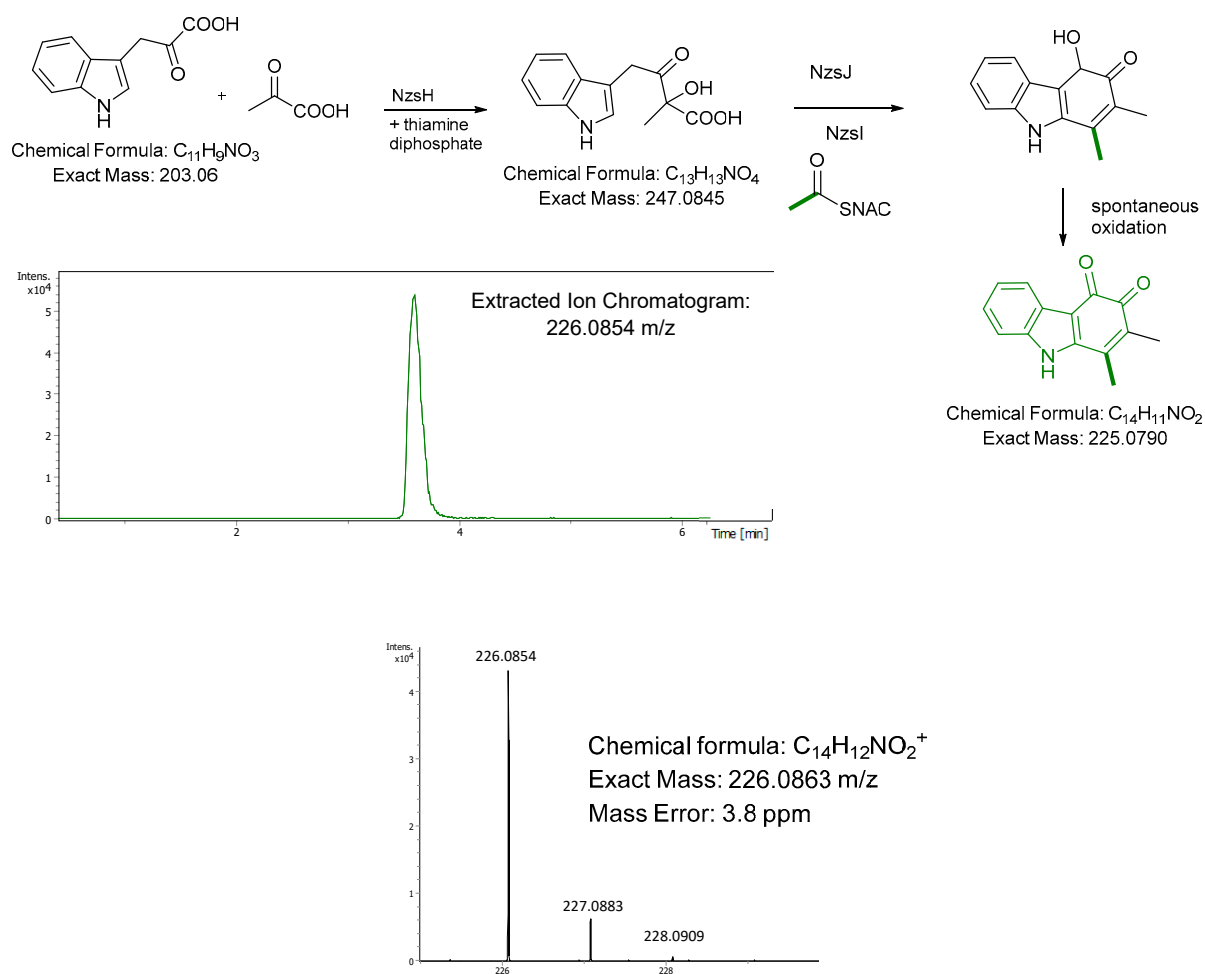

**Figure S4.** HR-LCMS analysis confirming production of acetyl-carbazole.

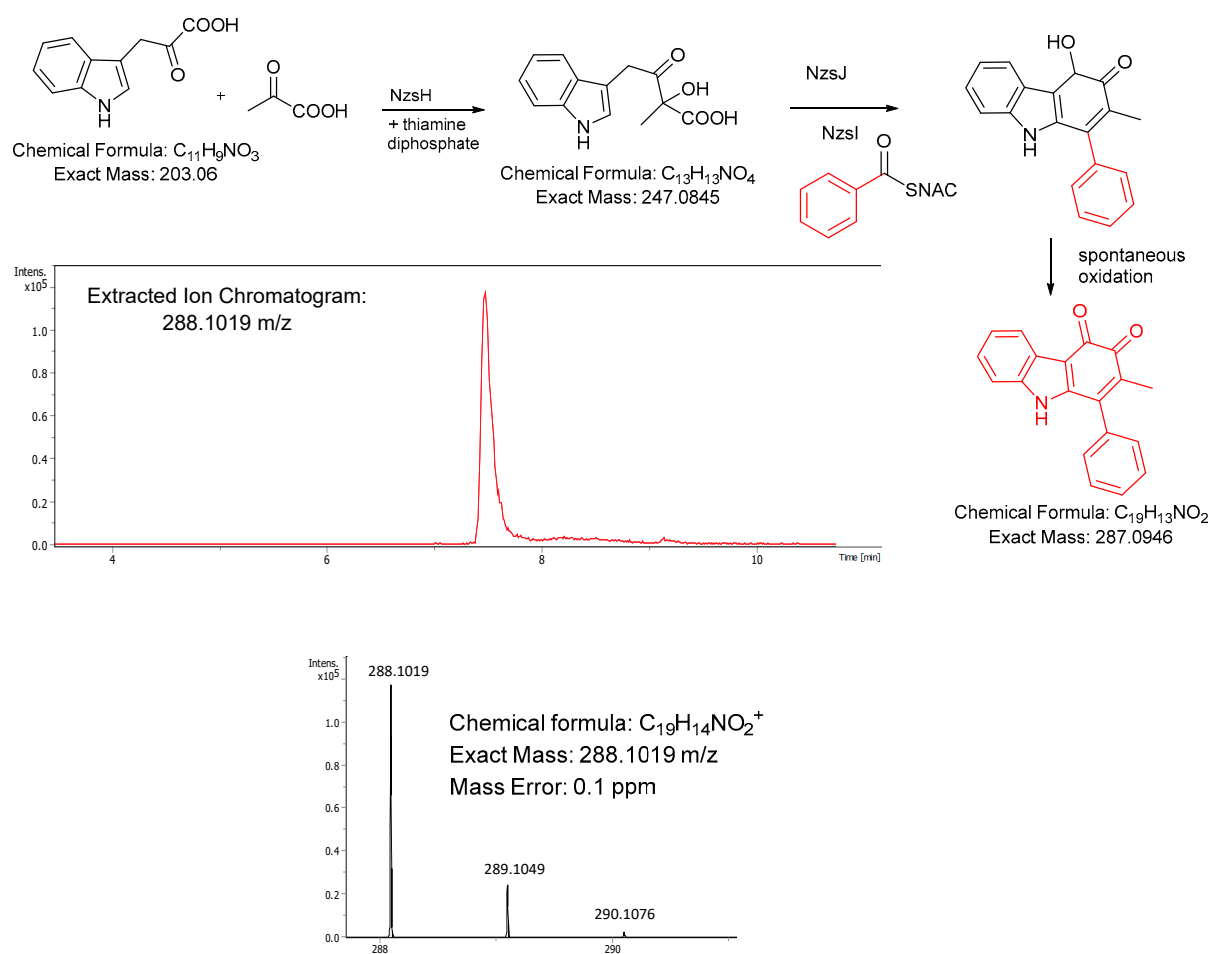

**Figure S5.** HR-LCMS analysis confirming production of phenyl-carbazole.

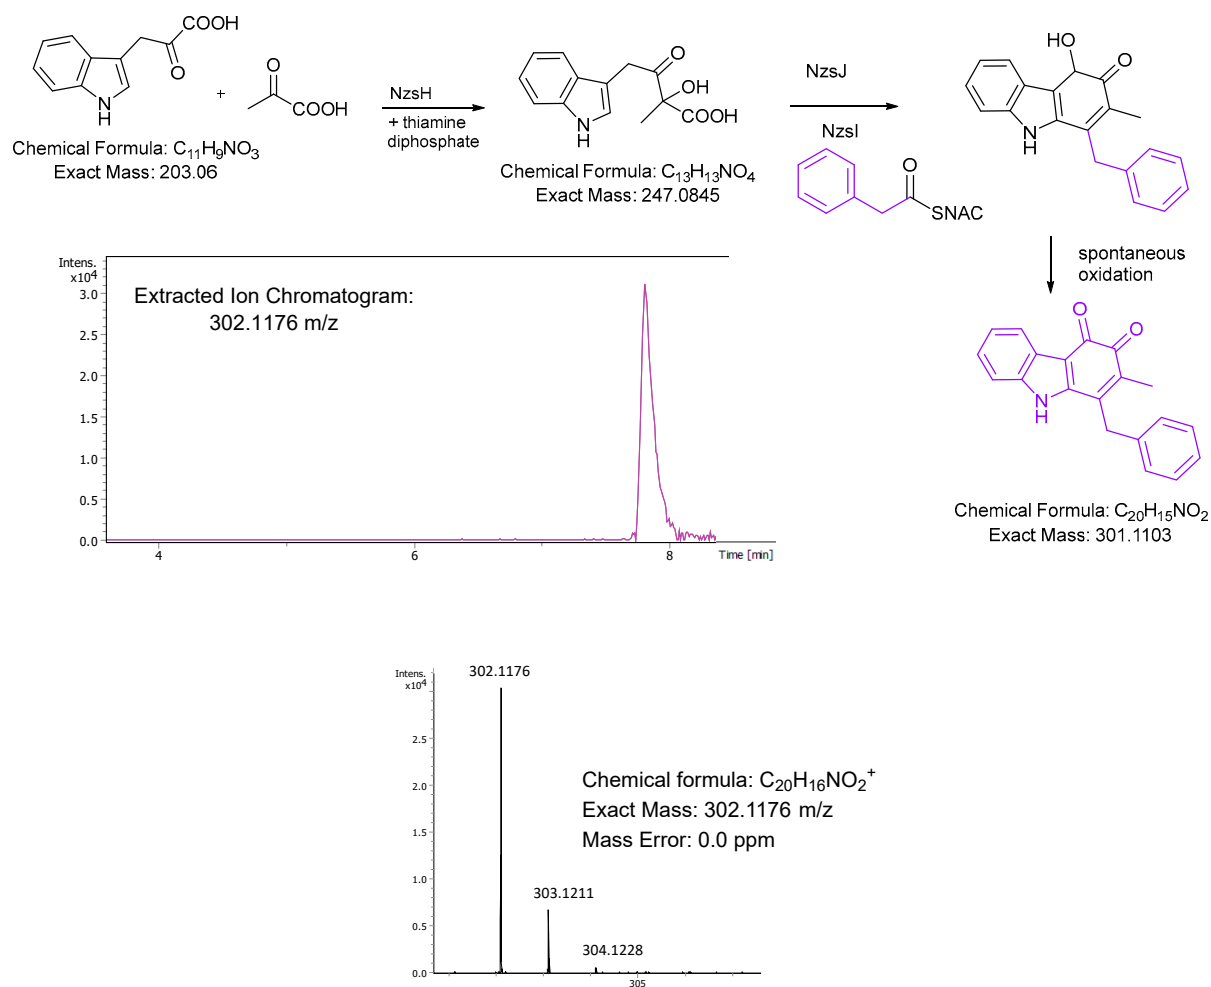

**Figure S6.** HR-LCMS analysis confirming production of phenyl-acetyl-carbazole.



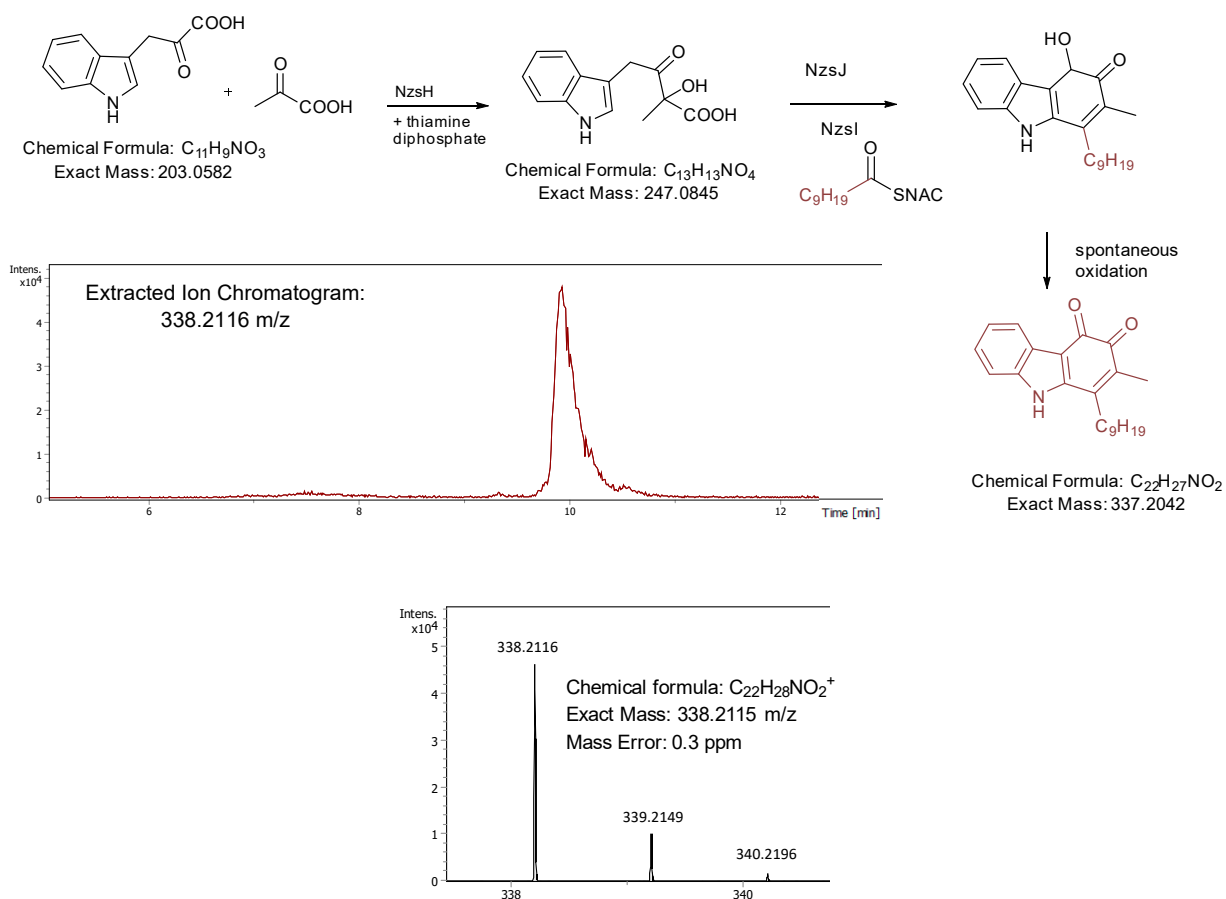

**Figure S7.** HR-LCMS analysis confirming production of decanoyl-carbazole.

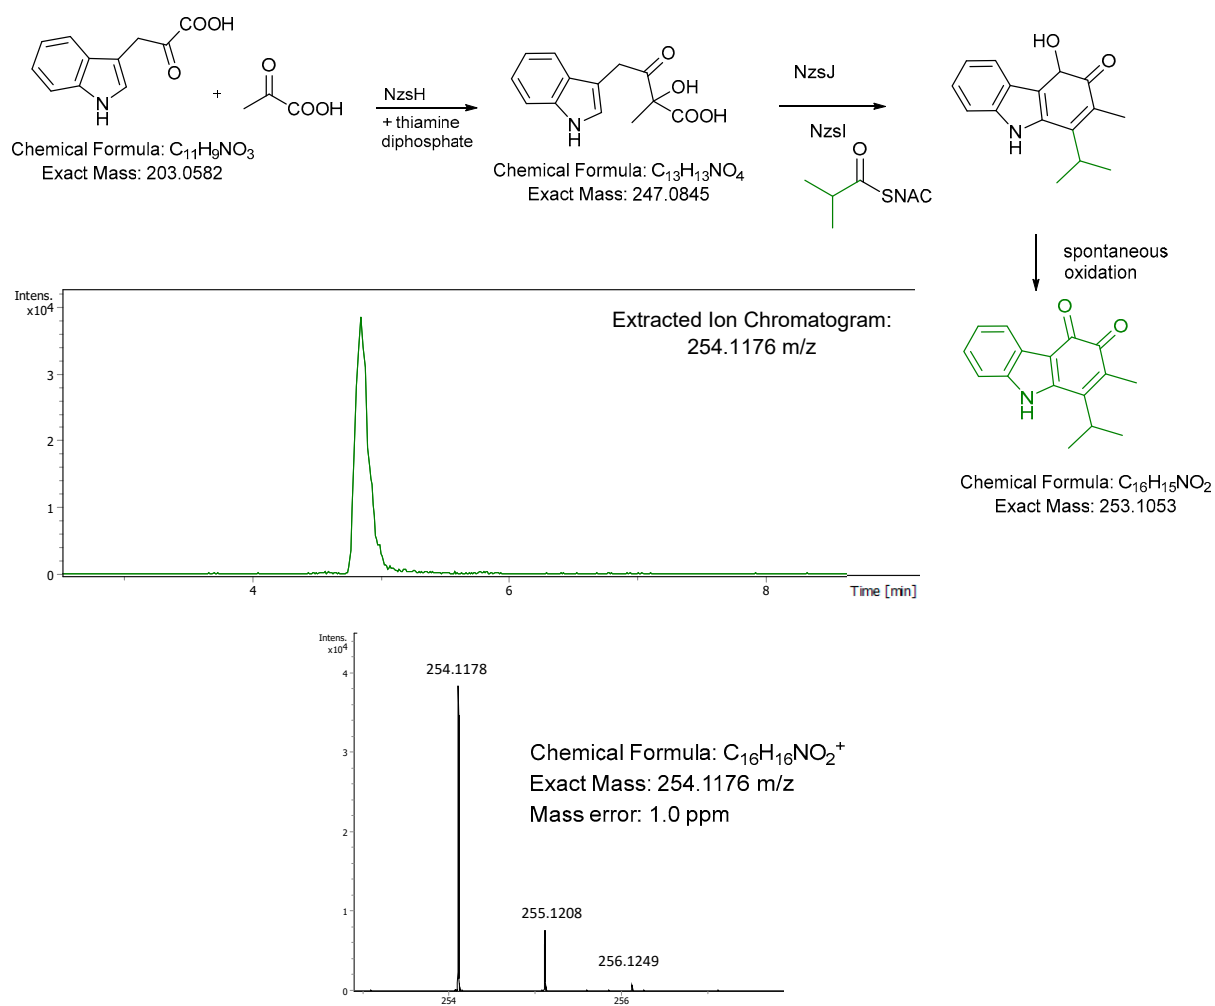

**Figure S8.** HR-LCMS analysis confirming production of isobutyryl-carbazole.

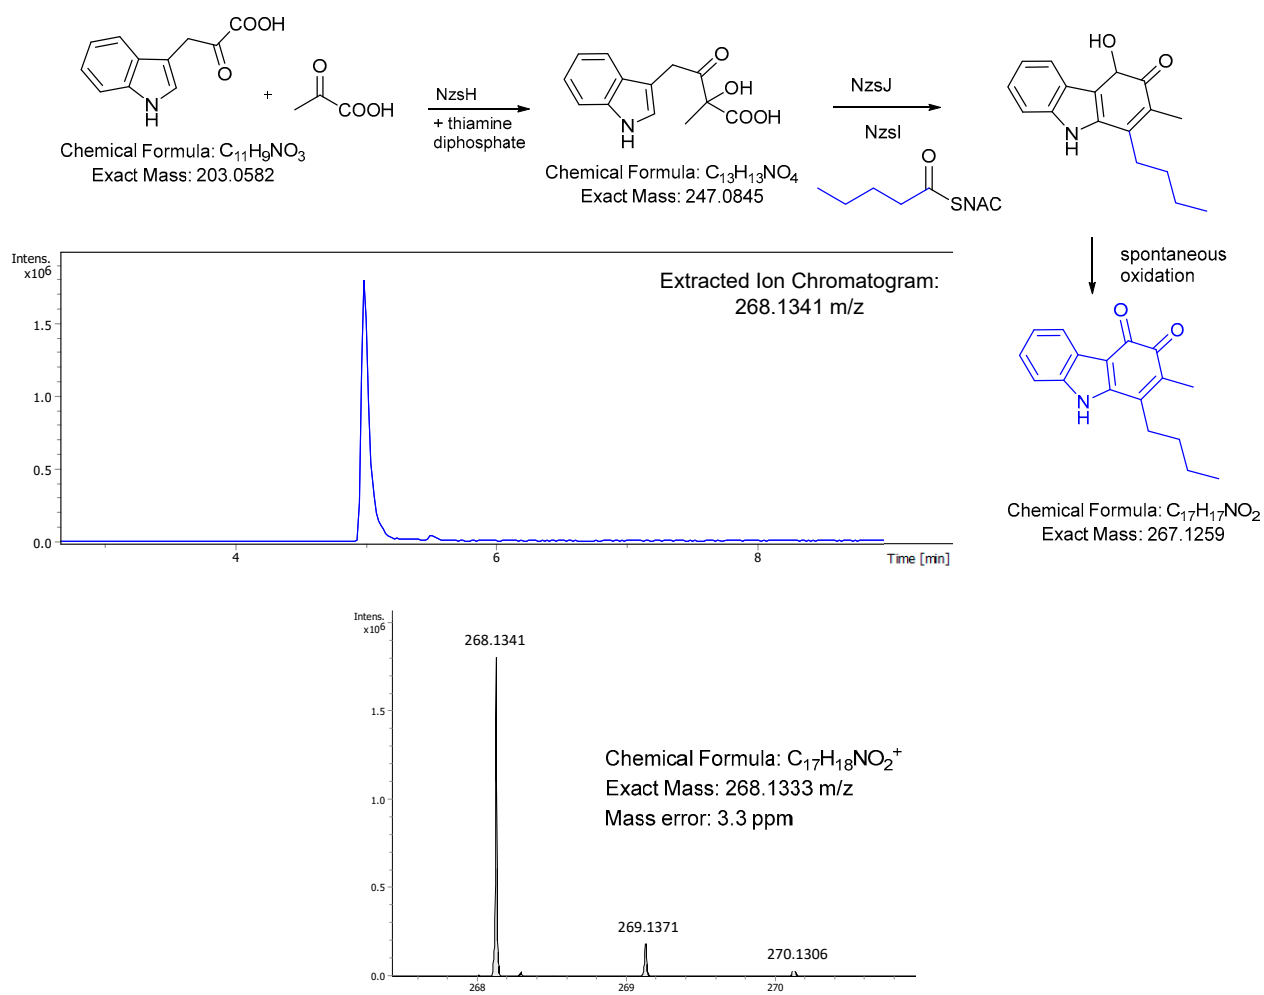

**Figure S9.** HR-LCMS analysis confirming production of valeryl-carbazole.

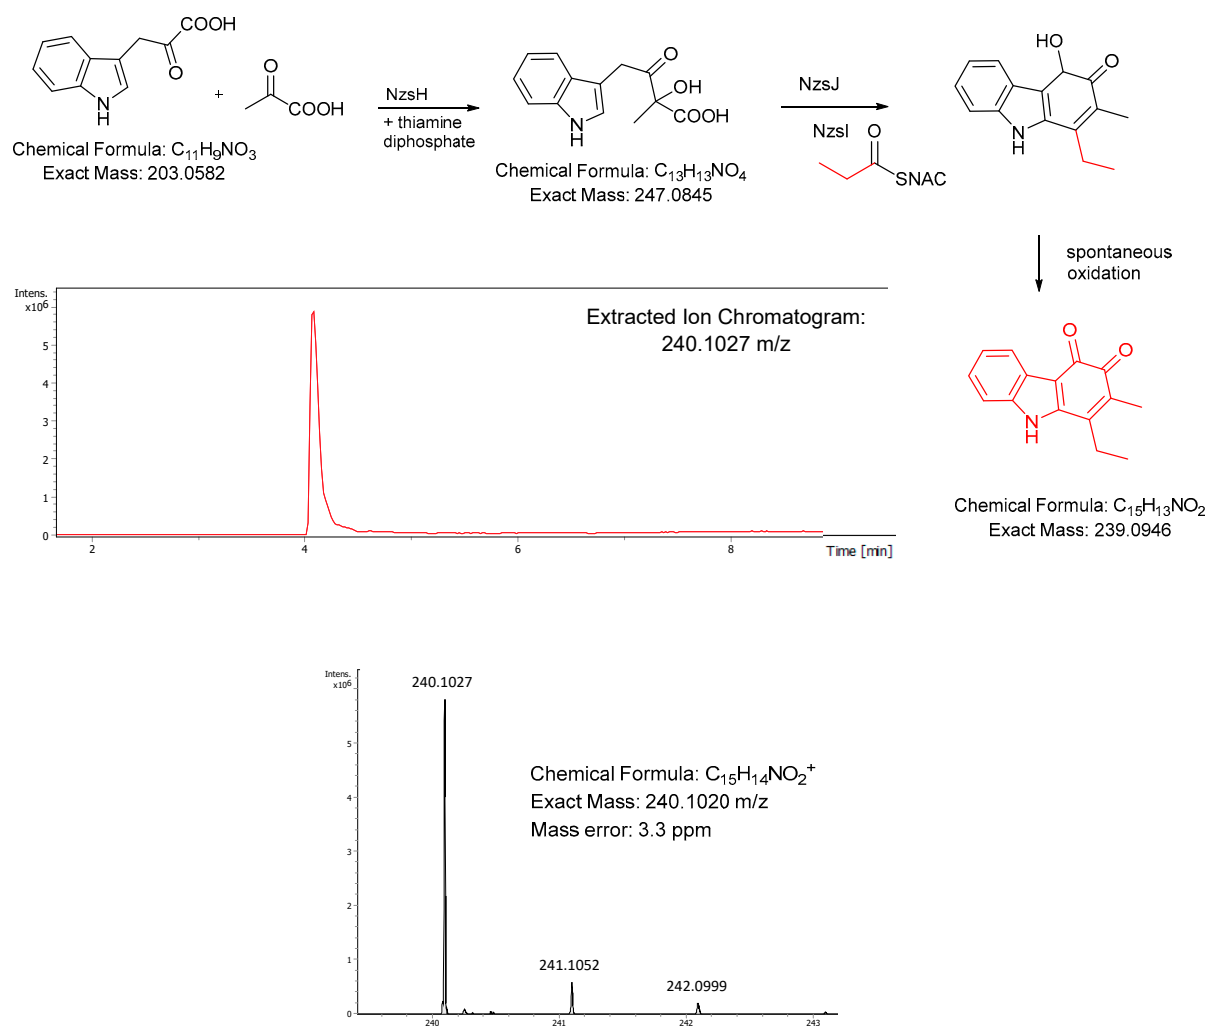

**Figure S10.** HR-LCMS analysis confirming production of propanoyl-carbazole.

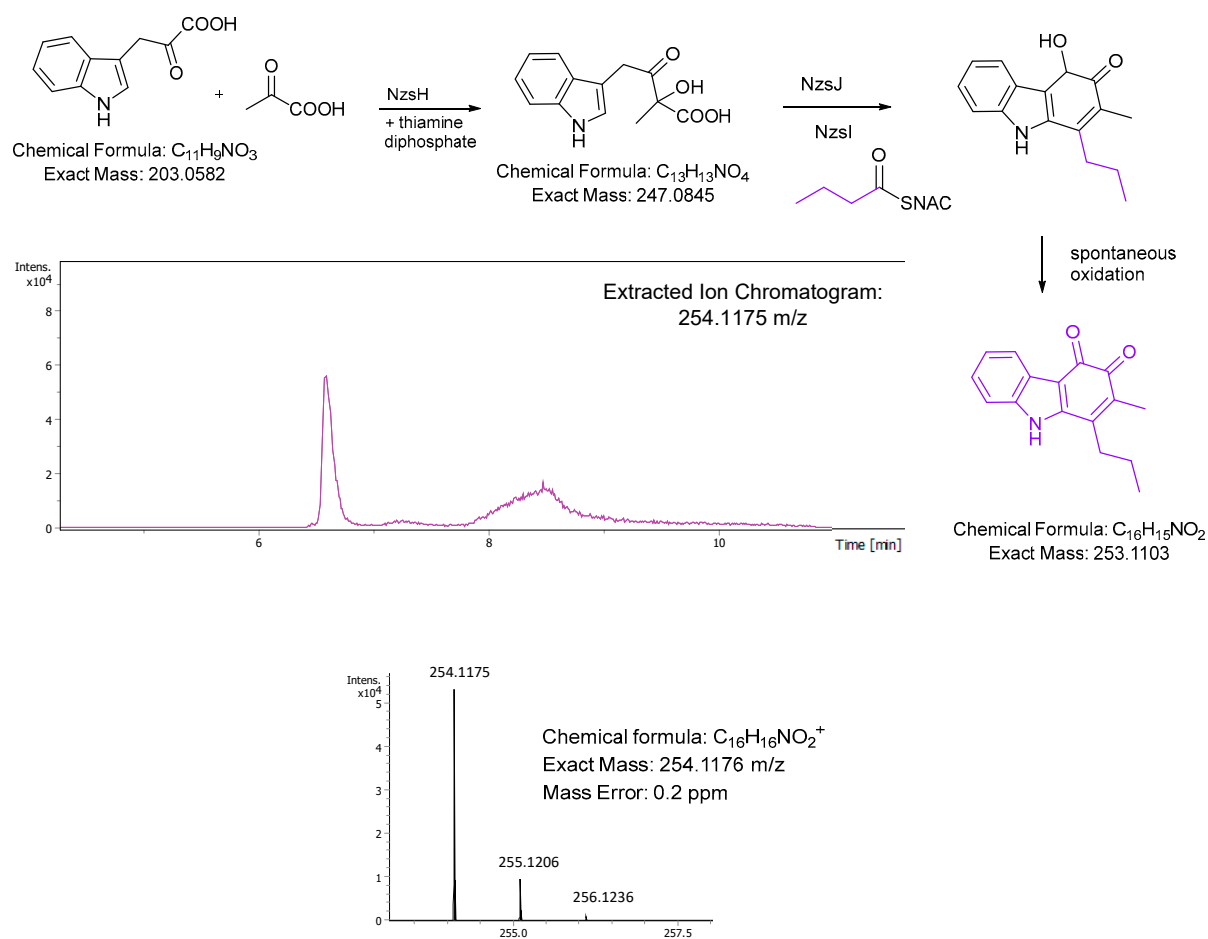

**Figure S11.** HR-LCMS analysis confirming production of butyl-carbazole.

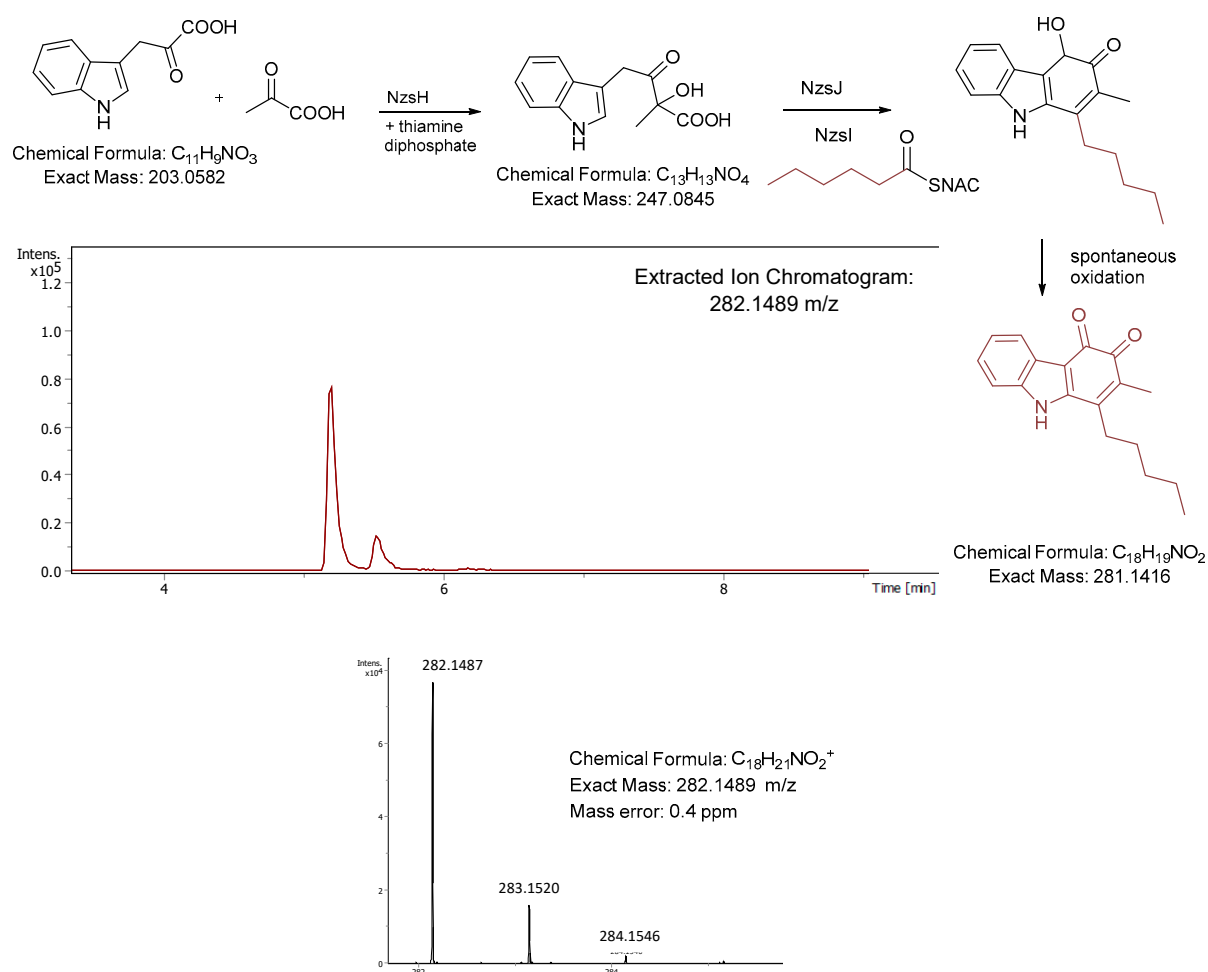

**Figure S12.** HR-LCMS analysis confirming production of hexyl-carbazole.



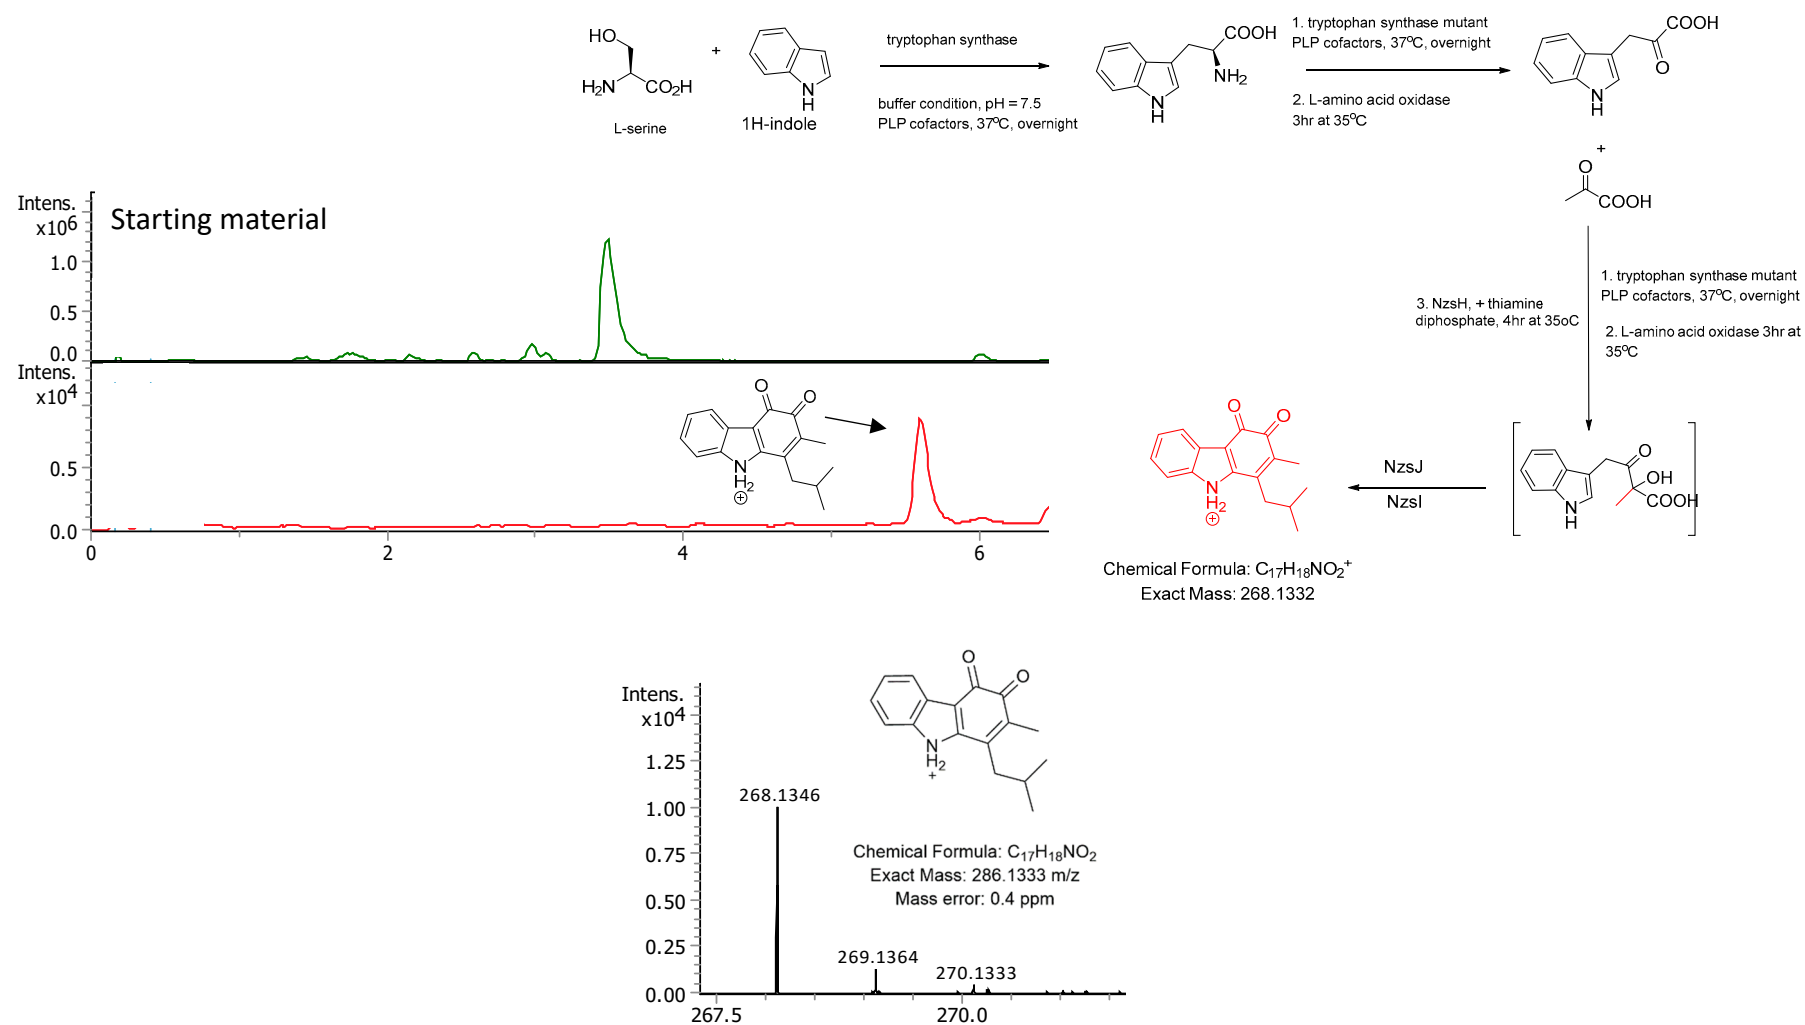

**Figure S14.** 5-step one-pot enzymatic reaction and HR-LCMS analysis confirming production of isovaleryl-carbazole.
